# Supplementary material for: Antibiotic prophylaxis with teicoplanin on alternate days reduces rate of viridans sepsis and febrile neutropenia in pediatric patients with acute myeloid leukemia
Source: Springer Nature journal article supplement (doi:10.1007/s00277-016-2833-5), 2016-10-03
Supplement: MOESM1 [file 10810810]

**Antibiotic prophylaxis with teicoplanin on alternate days reduces rate of viridans sepsis and febrile neutropenia in pediatric patients with acute myeloid leukemia**

Heidrun Boztug, Nora Mühlegger, Ulrike Pötschger, Andishe Attarbaschi, Christina Peters, Georg Mann, Michael Dworzak

Correspondence: Heidrun Boztug and Michael Dworzak; St. Anna Kinderspital and Children's Cancer Research Institute, Department of Pediatrics, Medical University of Vienna; E-mail: [heidrun.boztug@stanna.at](mailto:heidrun.boztug@stanna.at) and [michael.dworzak@stanna.at](mailto:michael.dworzak@stanna.at)**Supplemental Table 1. Chemotherapy cycles in AML-BFM 2004**

|                        |                           | Dose,<br>mg/sqm/dose                              | Days  | Total dose of<br>cytarabine<br>(mg/sqm) |
|------------------------|---------------------------|---------------------------------------------------|-------|-----------------------------------------|
| <b>Induction 1</b>     | <b>ADxE</b>               |                                                   |       |                                         |
|                        | Cytarabine                | 100 as<br>continuous<br>infusion over 48<br>hours | 1,2   | 1400                                    |
|                        | Cytarabine                | 100 every 12<br>hours                             | 3-8   |                                         |
|                        | Etoposide                 | 150                                               | 6,7,8 |                                         |
|                        | <b>AIE</b>                |                                                   |       |                                         |
|                        | Cytarabine                | 100 as<br>continuous<br>infusion over 48<br>hours | 1,2   | 1400                                    |
|                        | Cytarabine                | 100 every 12<br>hours                             | 3-8   |                                         |
|                        | Etoposide                 | 150                                               | 6,7,8 |                                         |
|                        | Idarubicine               | 12                                                | 3,5,7 |                                         |
|                        | <b>Induction 2</b>        | <b>HAM (HR only)</b>                              |       |                                         |
| Cytarabine             |                           | 3000 every 12<br>hours                            | 1-3   | 18000                                   |
| Mitoxantrone           |                           | 10                                                | 3,4   |                                         |
| <b>AI (SR only)</b>    |                           |                                                   |       |                                         |
| Cytarabine             |                           | 500 as<br>continuous<br>infusion                  | 1-4   | 2000                                    |
|                        | Idarubicine               | 7                                                 | 3,5   |                                         |
| <b>Consolidation 1</b> | <b>AI/2-CDA (HR only)</b> |                                                   |       |                                         |
|                        | Cytarabine                | 500 as<br>continuous<br>infusion                  | 1-4   | 2000                                    |
|                        | Idarubicine               | 7                                                 | 3,5   |                                         |
|                        | 2-CDA                     | 6                                                 | 1,3   |                                         |

|                        |              |                     |         |       |
|------------------------|--------------|---------------------|---------|-------|
| <b>Consolidation 2</b> | <b>haM</b>   |                     |         |       |
|                        | Cytarabine   | 1000 every 12 hours | 1-3     | 6000  |
|                        | Mitoxantrone | 10                  | 3,4     |       |
| <b>Intensification</b> | <b>HAE</b>   |                     |         |       |
|                        | Cytarabine   | 3000 every 12 hours | 1-3     | 18000 |
|                        | Etoposide    | 125                 | 2,3,4,5 |       |
